# Supplementary material for: Identification of biomarker‐by‐treatment interactions in randomized clinical trials with survival outcomes and high‐dimensional spaces
Source: PubMed Central journal article supplement (PMC5763402; doi:10.1002/bimj.201500234), 2016-11-15

**Scenario 4a (shape = 0.5)**

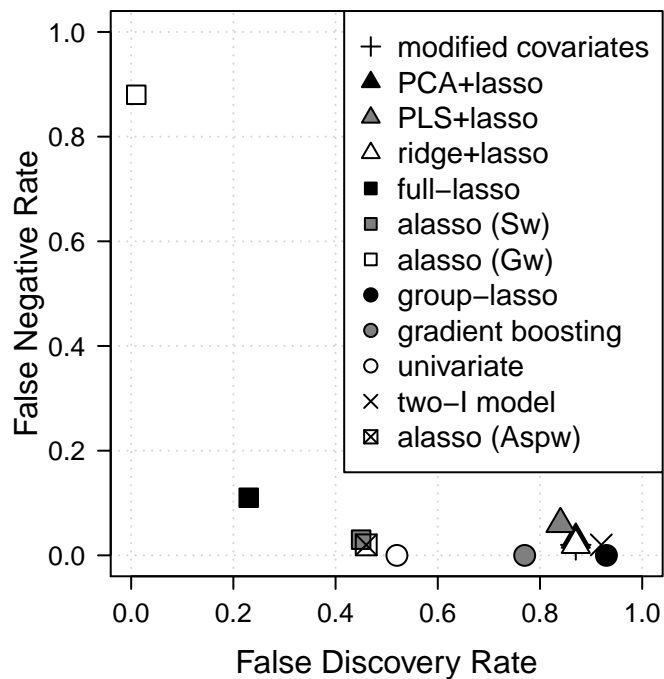

**Scenario 5a (shape = 0.5)**

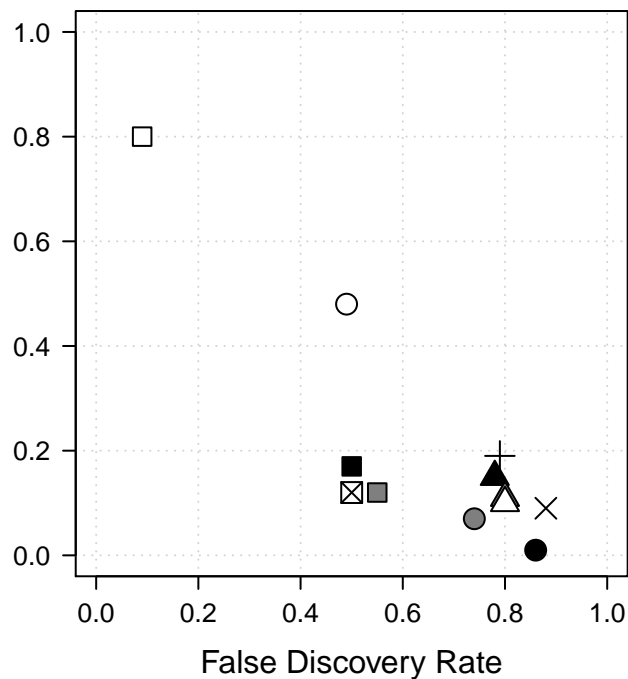

**Scenario 6a (shape = 0.5)**

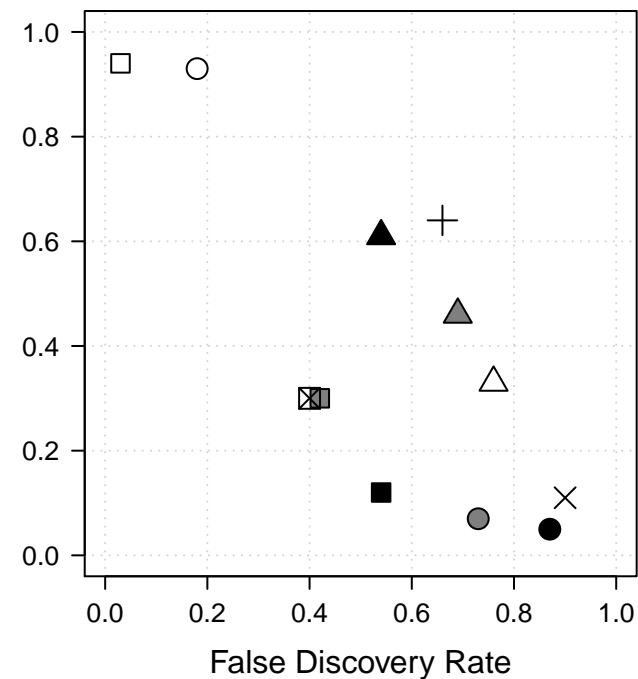

**Scenario 4a (shape = 0.5)**

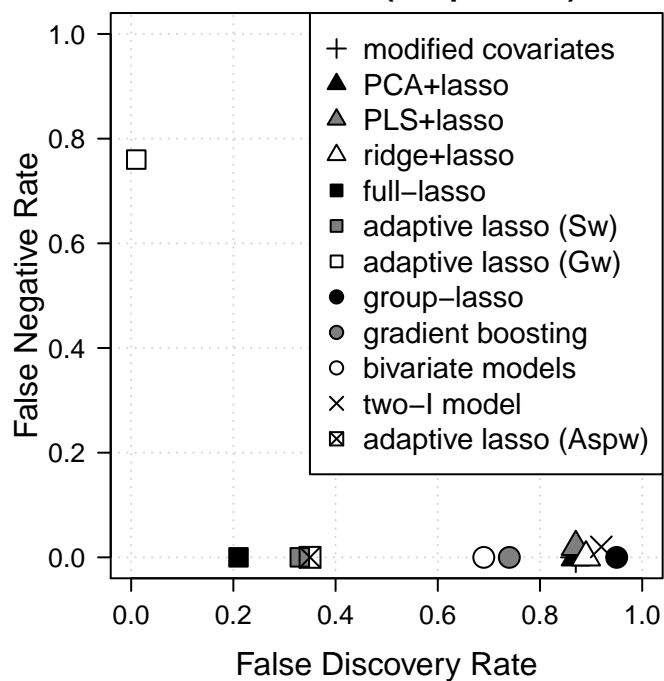

**Scenario 5a (shape = 0.5)**

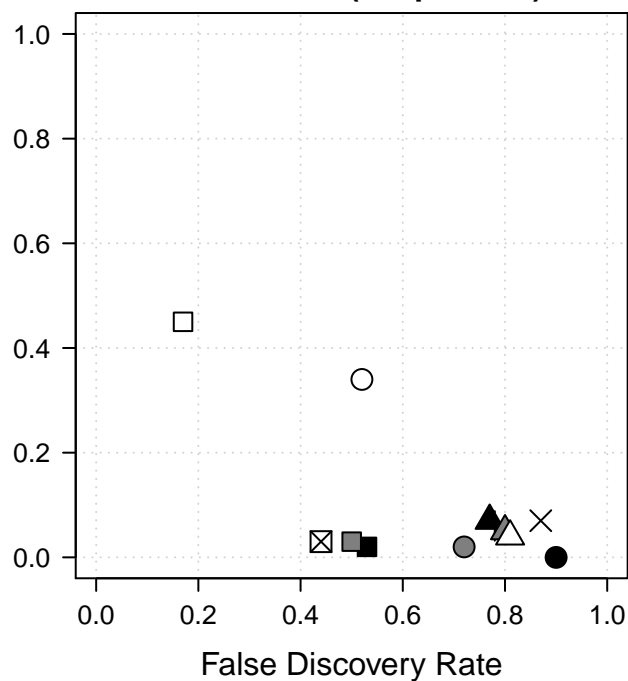

**Scenario 6a (shape = 0.5)**

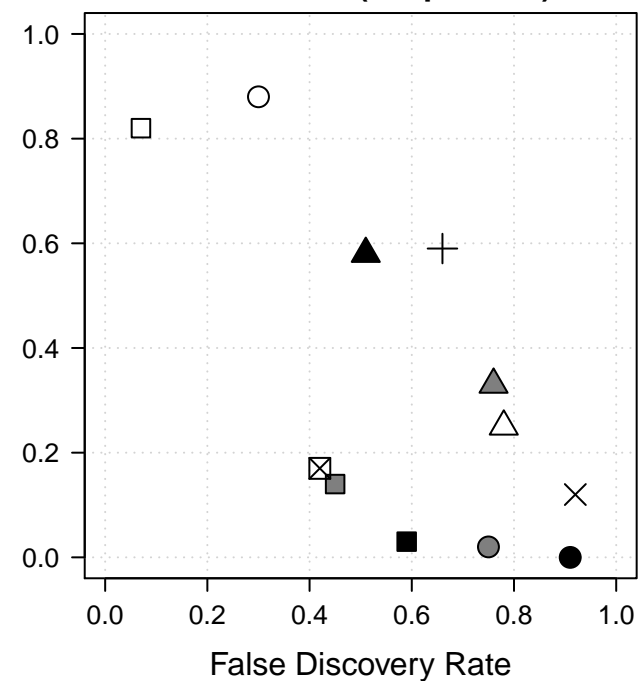

Supplement: BIMJ-59-685-s001.pdf [file BIMJ-59-685-s001.pdf]
