# Supplementary material for: Identification of biomarker‐by‐treatment interactions in randomized clinical trials with survival outcomes and high‐dimensional spaces
Source: PubMed Central journal article supplement (PMC5763402; doi:10.1002/bimj.201500234), 2016-11-15

**Scenario 6a**

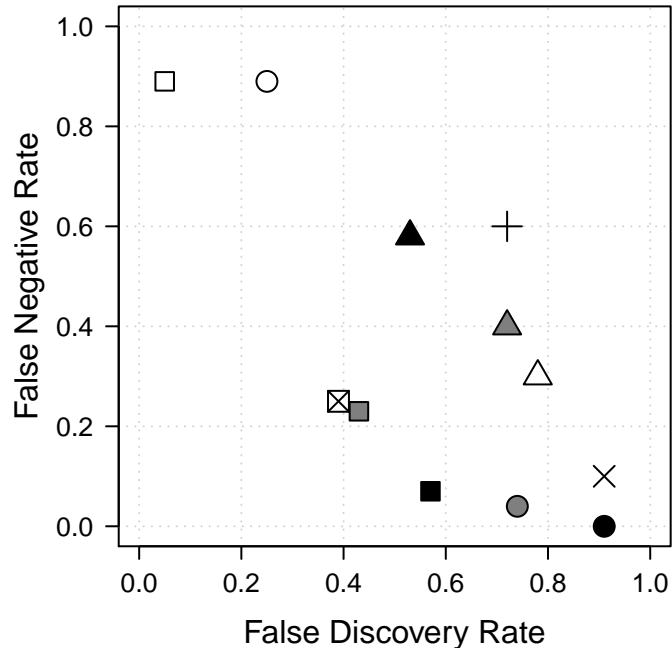

**Scenario 6a + correlation 0.6  
between the treatment-effect modifiers**

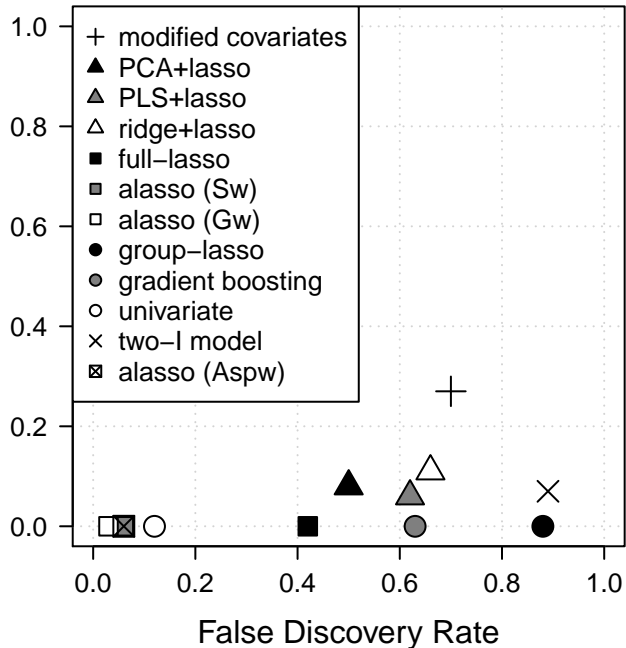

**Scenario 6a + correlation 0.6  
between all the active markers**

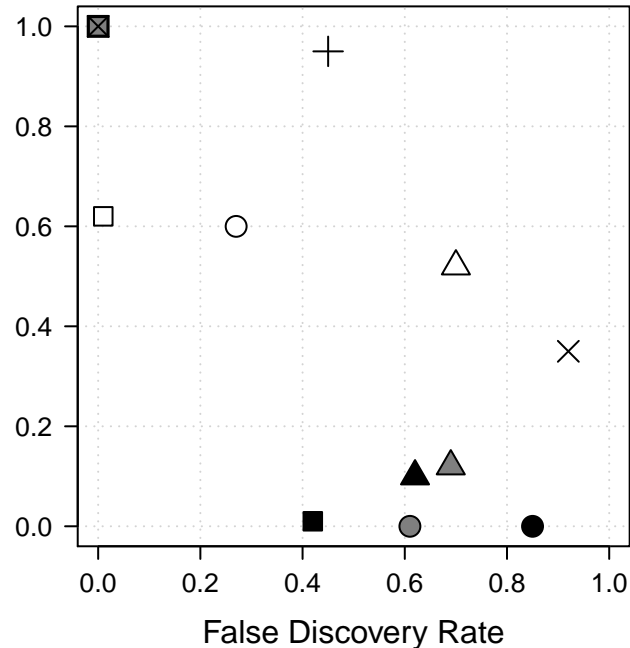

Supplement: BIMJ-59-685-s002.pdf [file BIMJ-59-685-s002.pdf]
