# Supplementary material for: Identification of biomarker‐by‐treatment interactions in randomized clinical trials with survival outcomes and high‐dimensional spaces
Source: PubMed Central journal article supplement (PMC5763402; doi:10.1002/bimj.201500234), 2016-11-15

## Supplementary Figure legends

### SUPPLEMENTARY FIGURE 1:

TITLE: False Negative Rate against the False Discovery Rate in alternative scenarios for time-decreasing (1<sup>st</sup> row) and time-increasing (2<sup>nd</sup> row) hazards

LEGENDS: Average quantities across 250 replications.

### SUPPLEMENTARY FIGURE 2:

TITLE: False Negative Rate against the False Discovery Rate in alternative scenarios for several correlation structures between active markers

LEGENDS: Average quantities across 250 replications.

# Supplementary Figure 1

## Scenario 4a (shape = 0.5)

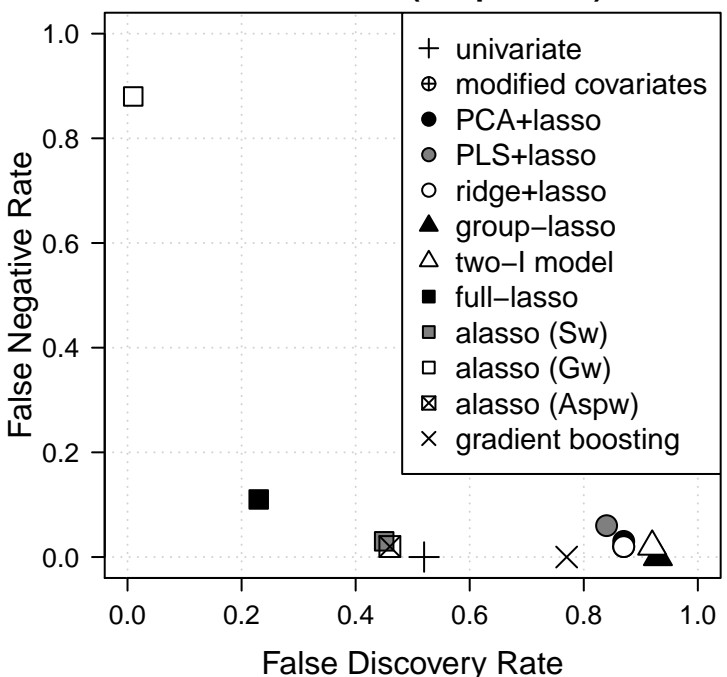

## Scenario 5a (shape = 0.5)

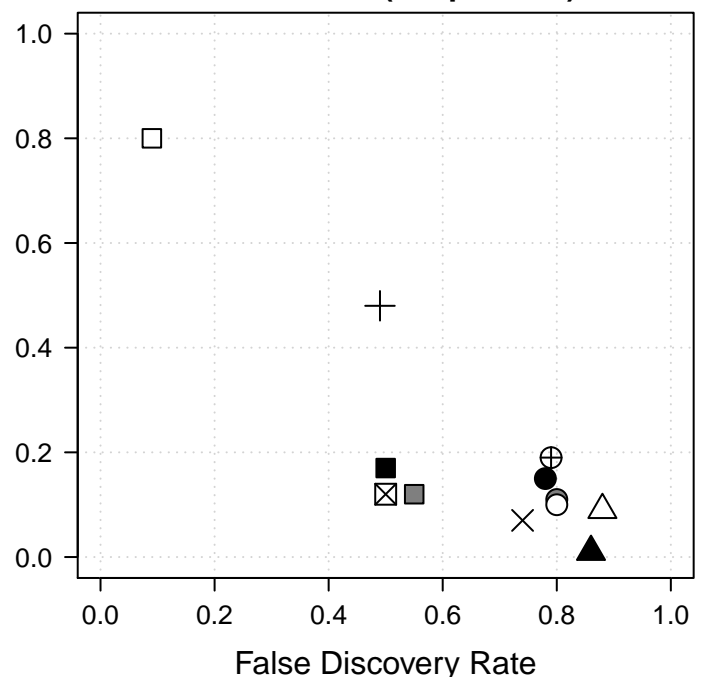

## Scenario 6a (shape = 0.5)

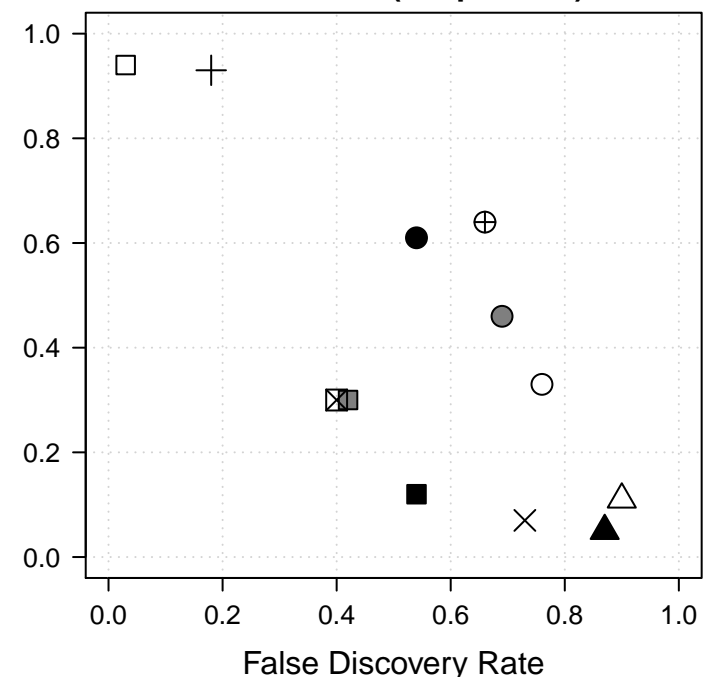

## Scenario 4a (shape = 2)

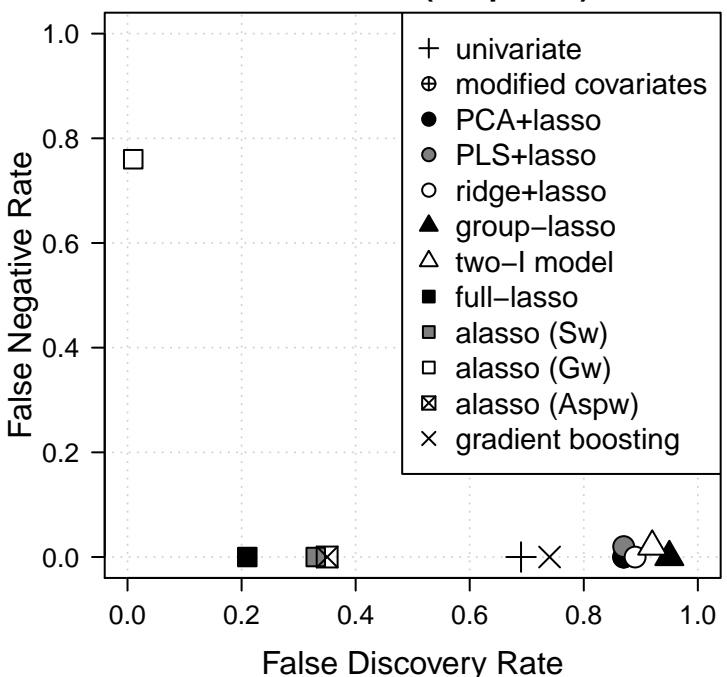

## Scenario 5a (shape = 2)

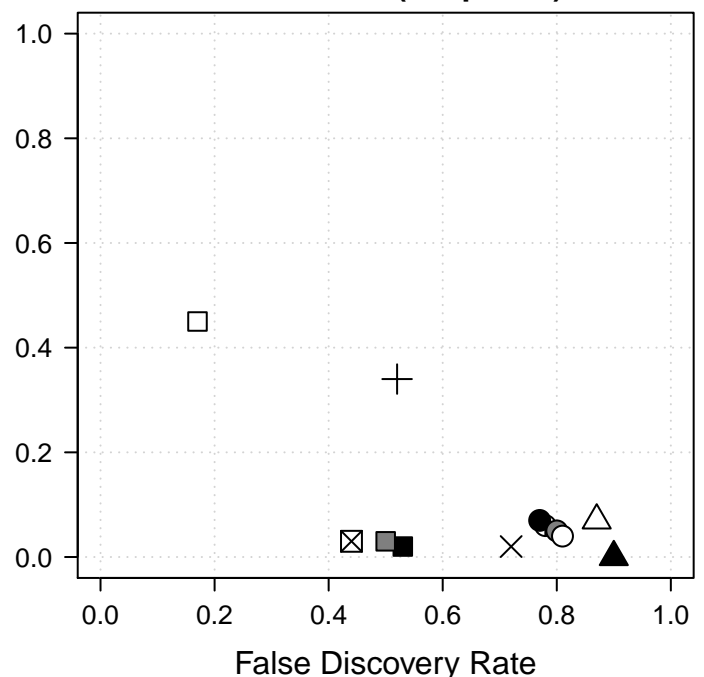

## Scenario 6a (shape = 2)

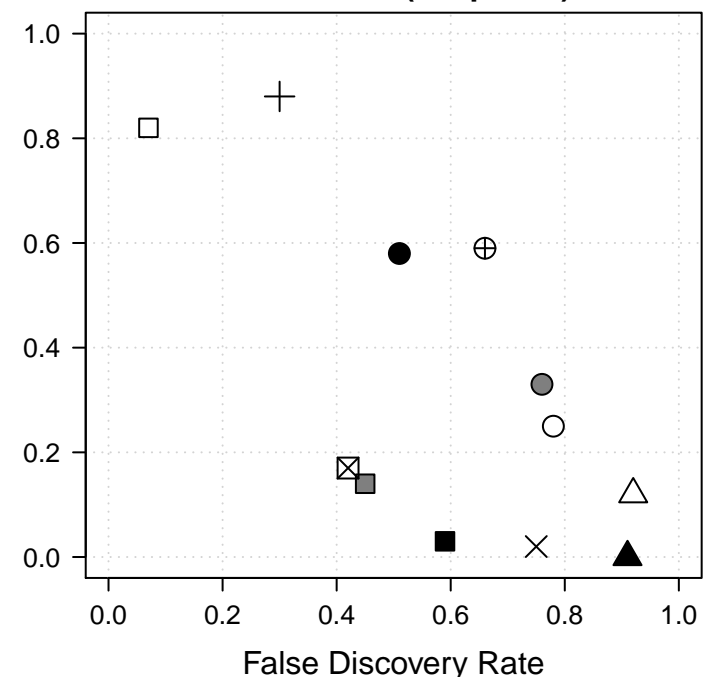

Supplementary Figure 2

Scenario 6a

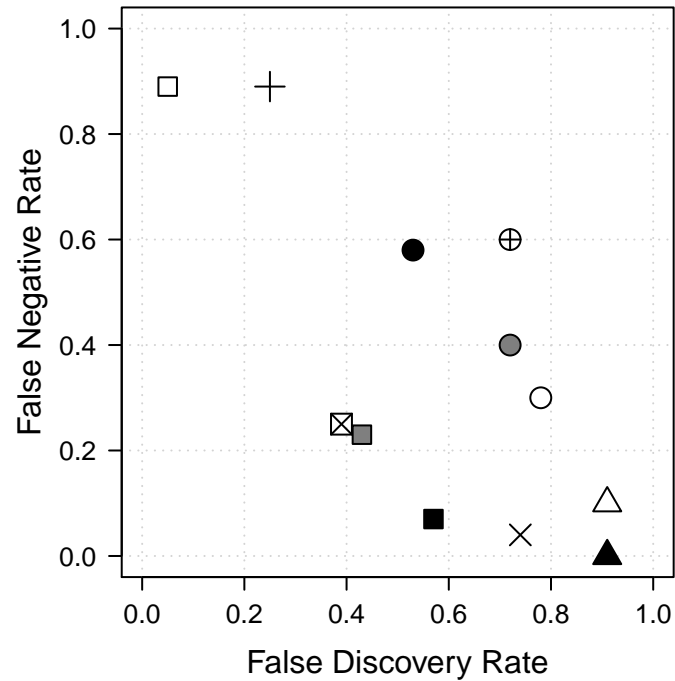

Scenario 6a + correlation 0.6  
between the treatment-effect modifiers

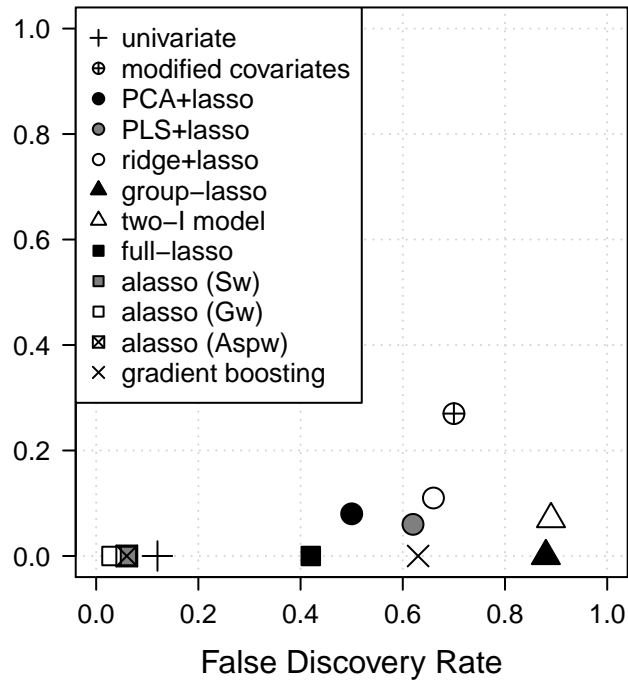

Scenario 6a + correlation 0.6  
between all the active markers

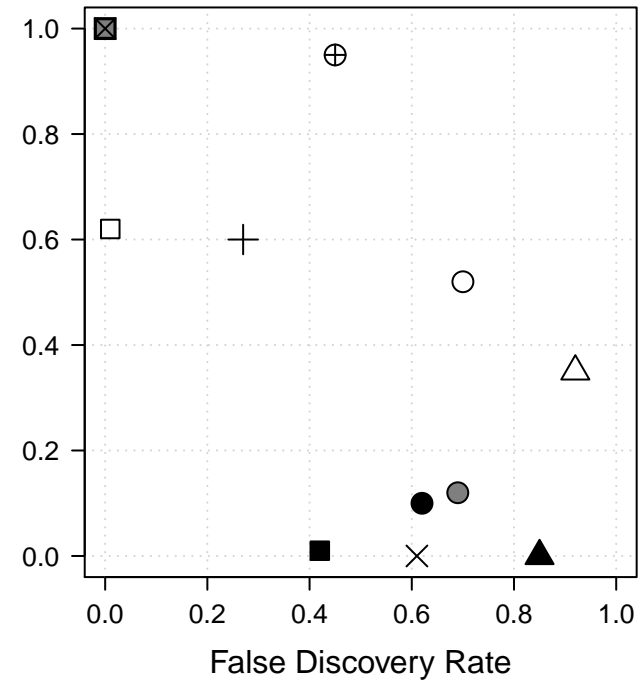

Supplement: BIMJ-59-685-s003.pdf [file BIMJ-59-685-s003.pdf]
